# Supplementary material for: A European giant: a large spinosaurid (Dinosauria: Theropoda) from the Vectis Formation (Wealden Group, Early Cretaceous), UK
Source: PeerJ journal article supplement (doi:10.7717/peerj.13543), 2022-06-09

## Supplementary Figures: A European giant: remains of a large spinosaurid (Dinosauria: Theropoda) from the Vectis Formation (Wealden Group, Early Cretaceous), UK.

Chris T. Barker, Jeremy A. F. Lockwood, Darren Naish, Sophie Brown, Amy Hart<sup>5</sup>, Ethan Tulloch, Neil J. Gostling.

Supplementary figure 1–4. Indeterminate bone fragments referred to IWCMS 2018.30. Dashed lines indicate surfaces presented in other views (see respective enumeration). Abbreviations: can: cancellous bone; con: concavity; cor: cortical bone; for: foramina; ri, ridge. Scale bars: 50mm.



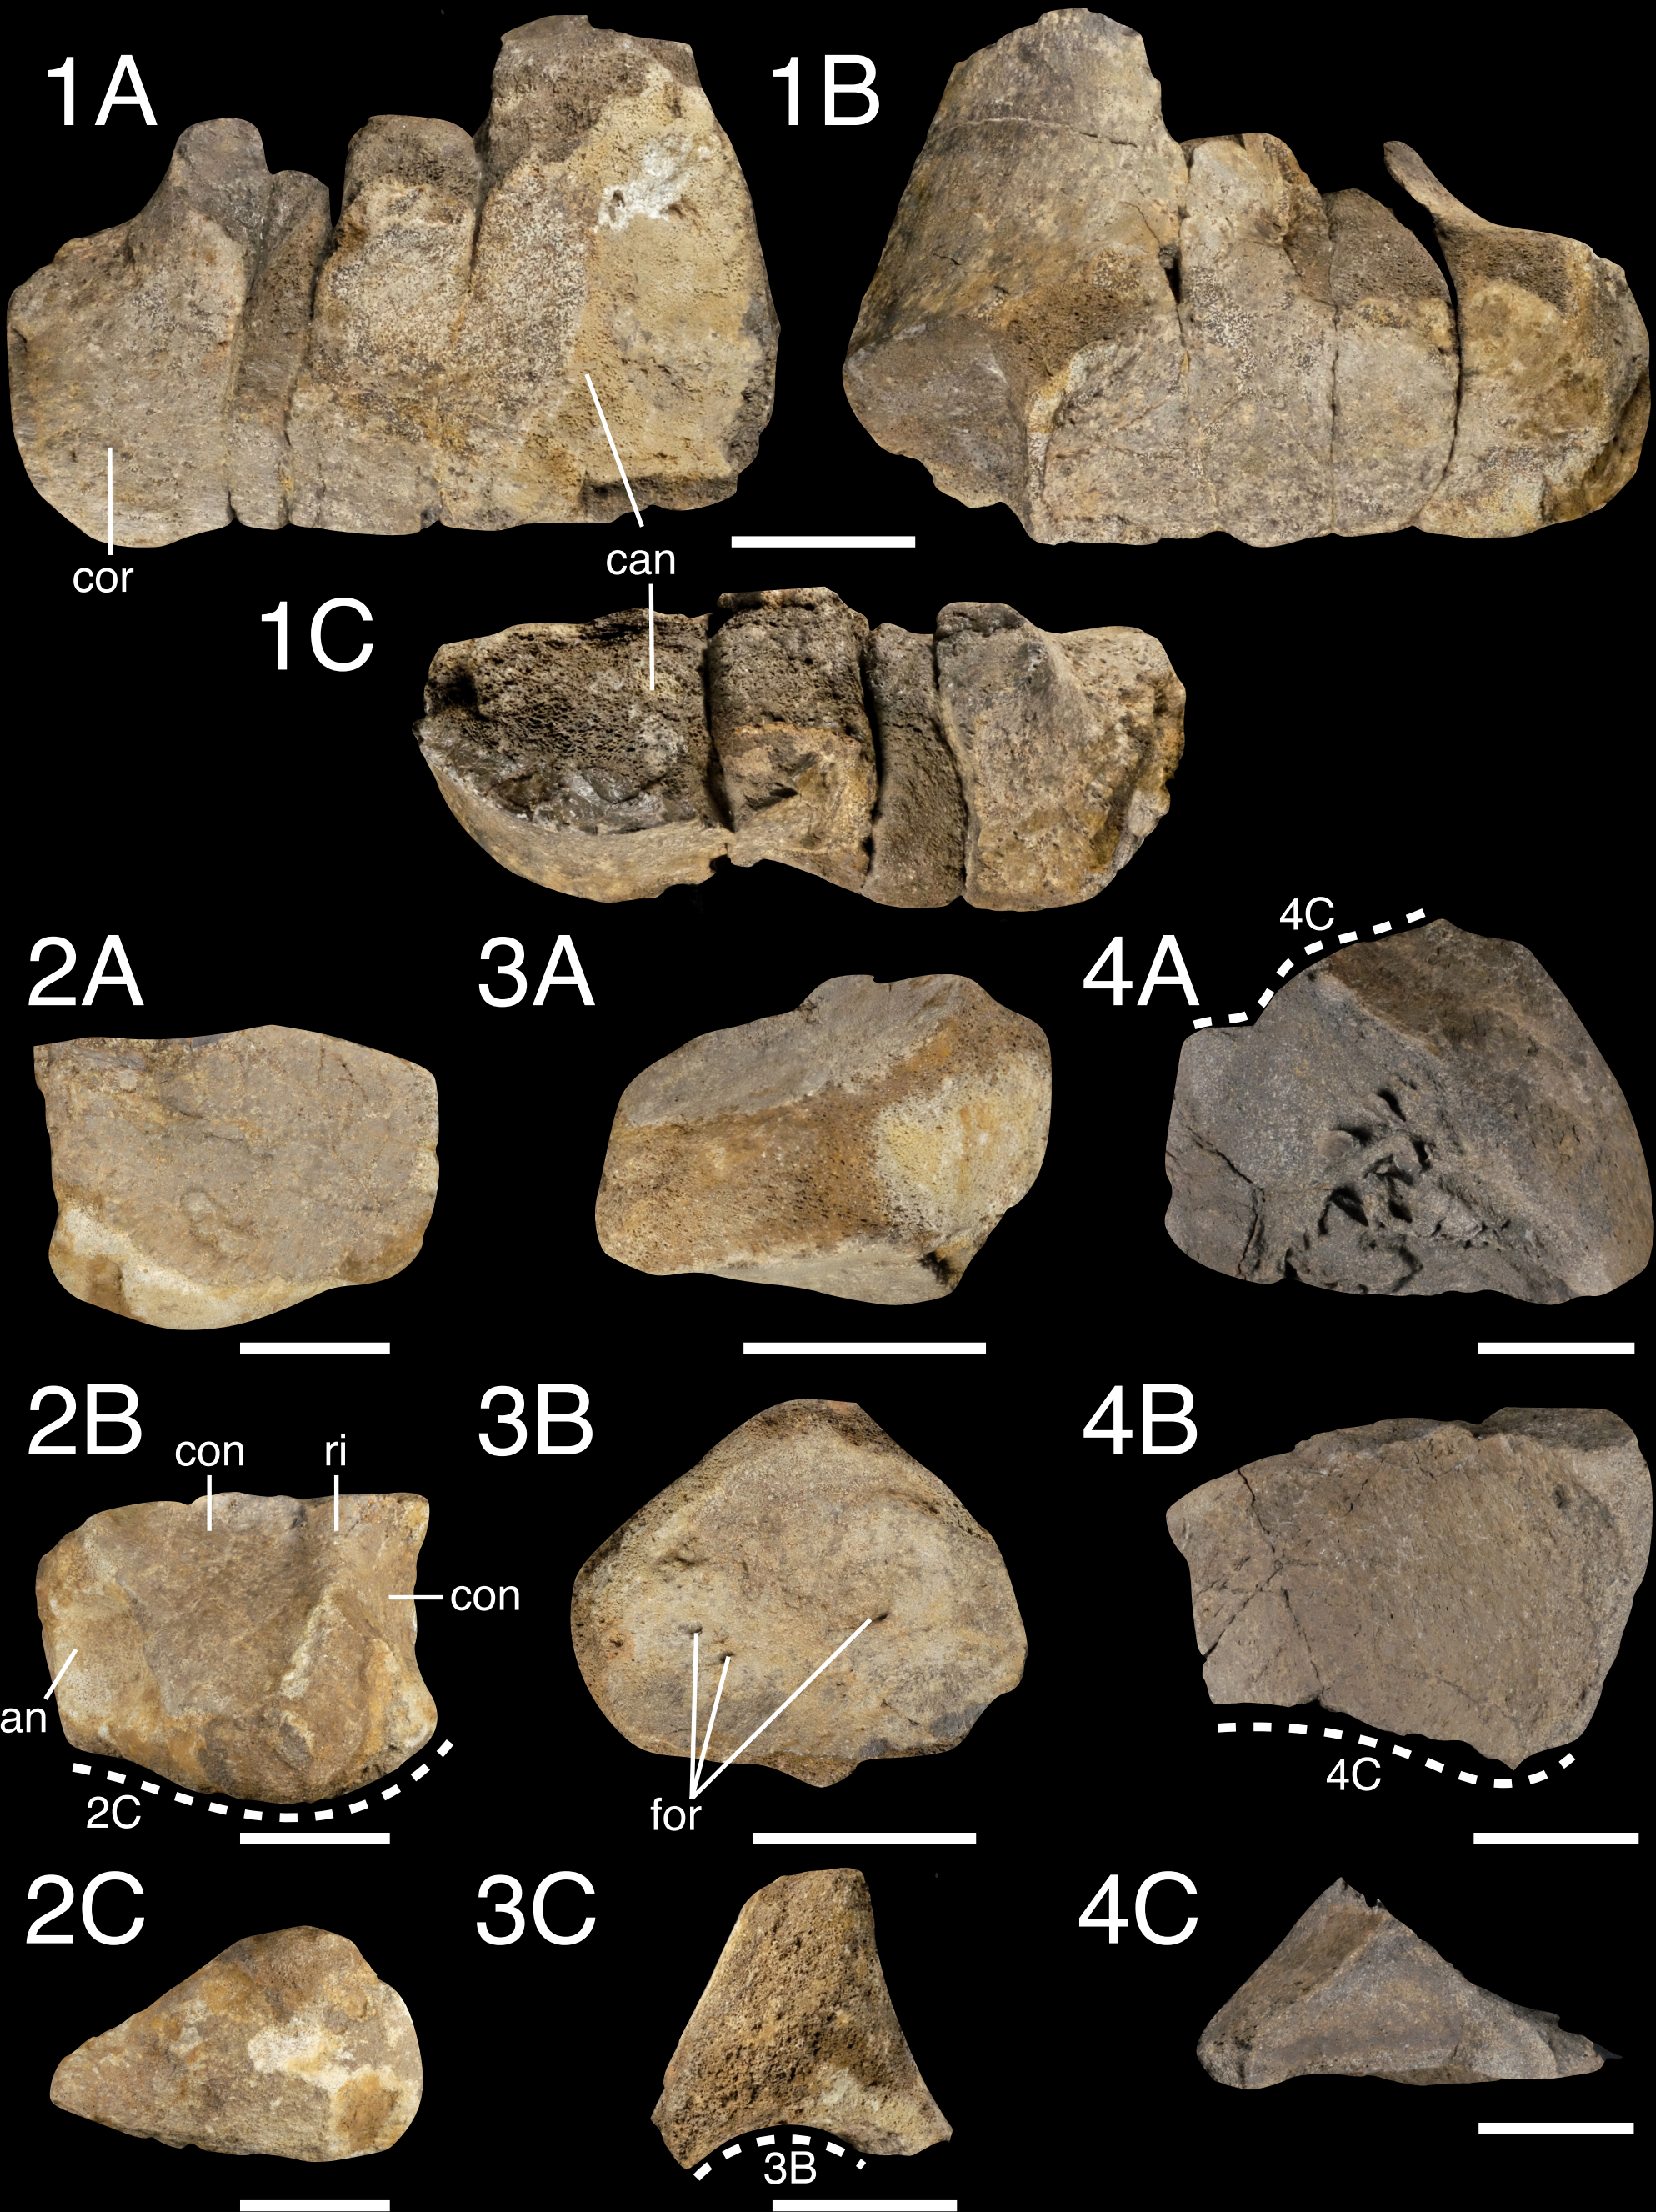

Supplement: Supplementary_Figures.pdf [file Supplementary_Figures.pdf]
